# Supplementary material
Source: MDPI journal article supplement (https://www.mdpi.com/2075-163X/10/2/124)
Supplement: s1 [file s1]

## Supplementary Materials

**Table S1.** Unit cell parameters, bond distances, bond angles and tetrahedral volume of tetragonal cristobalite ( $P4_12_12$ ) from Rietveld refinement, compared to the (1) Downs & Palmer, (1994) and (2) Pluth et al. (1985).

|                              | (This study) | (1)       | (2)       |
|------------------------------|--------------|-----------|-----------|
| $a$ (Å)                      | 4.9727(6)    | 4.9717(4) | 4.9709(1) |
| $c$                          | 6.9257(5)    | 6.9223(3) | 6.9278(2) |
| Si-O X 2                     | 1.600(3)     | 1.6026(1) | 1.599(2)  |
| Si-O <sub>1</sub> X 2        | 1.607(3)     | 1.6034(1) | 1.606(2)  |
| Average                      | 1.603(3)     | 1.6030(1) | 1.603(2)  |
| O-O                          | 2.607(5)     | 2.6098(2) | 2.606(2)  |
| O-O <sub>1</sub> X 2         | 2.598(2)     | 2.5969(2) | 2.596(2)  |
| O-O <sub>11</sub> X 2        | 2.627(3)     | 2.6261(1) | 2.625(2)  |
| O-O <sub>111</sub>           | 2.651(6)     | 2.6494(1) | 2.651(2)  |
| Average                      | 2.618(4)     | 2.6175(2) | 2.616(2)  |
| Si-O1-Si (°)                 | 146.6(2)     | 146.50(1) | 146.7(1)  |
| TeT Volume (Å <sup>3</sup> ) | 2.114(4)     | 2.1126(2) | 2.111(2)  |

**Table S2.** Atomic coordinates and anisotropic thermal displacement parameters of tetragonal cristobalite (P4<sub>2</sub>2<sub>2</sub>) calculated by Rietveld method and PDF refinement.

| Atom | x         | y         | z         | U <sub>11</sub> | U <sub>22</sub> | U <sub>33</sub> | U <sub>12</sub> | U <sub>13</sub> | U <sub>23</sub> |
|------|-----------|-----------|-----------|-----------------|-----------------|-----------------|-----------------|-----------------|-----------------|
| Si   | 0.3007(3) | 0.3007(3) | 0         | 0.0089(2)       | 0.0086(2)       | 0.0088(2)       | -0.001(1)       | 0.002(1)        | -0.002(1)       |
| O    | 0.2390(5) | 0.1041(2) | 0.1787(4) | 0.0289(6)       | 0.0094(3)       | 0.0178(4)       | -0.002(1)       | 0.006(2)        | 0.001(1)        |

Lattice parameters:  $a = 4.9727(6)$  Å and  $c = 6.9257(5)$  Å

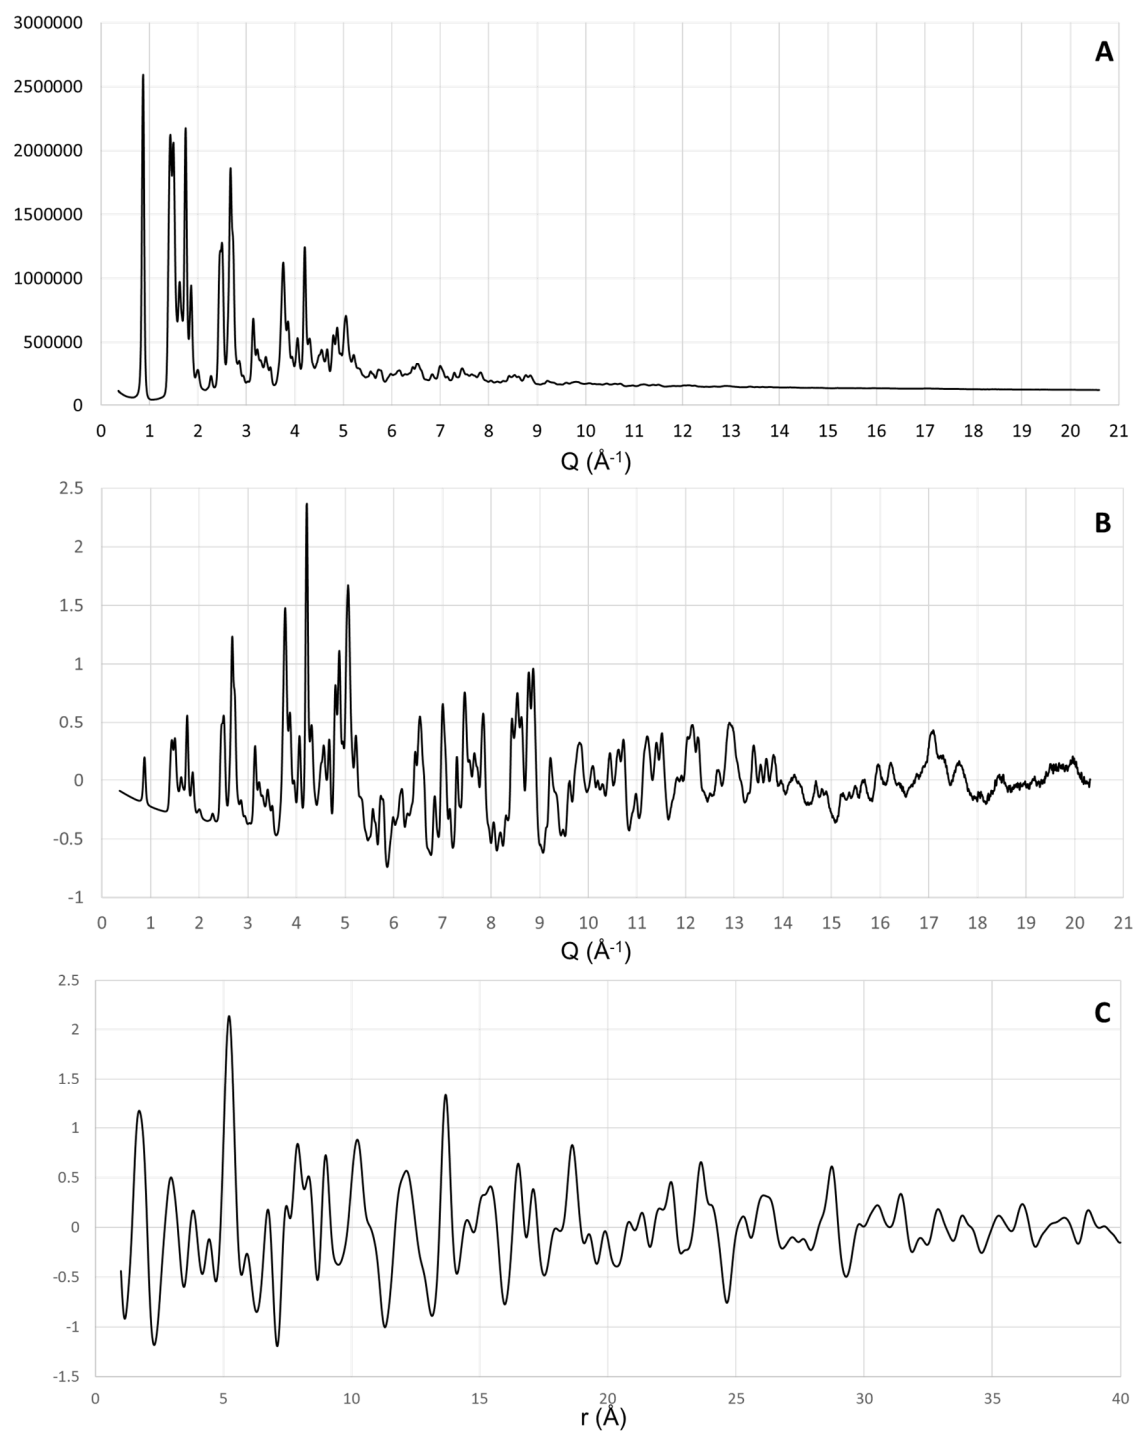

**Figure S1.** X-ray PDF analysis of (A)  $I(Q)$ , (B)  $F(Q)$ , and (C)  $G(r)$  for a kaolinite sample from Murfreesboro, Arkansas, USA.

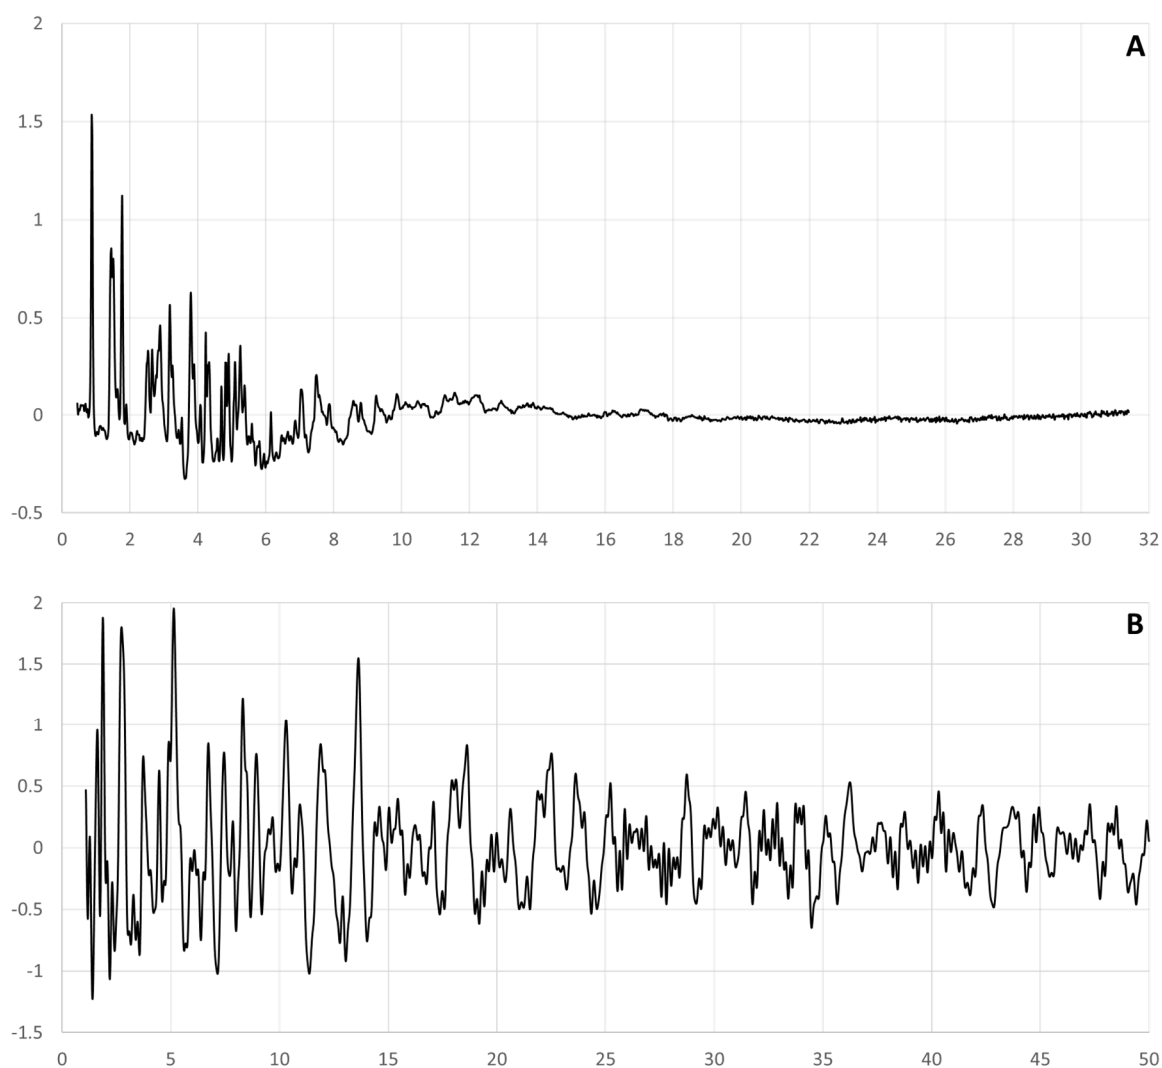

**Figure S2.** Neutron PDF analysis of (A)  $S(Q)$  and (B)  $G(r)$  for a kaolinite sample from Murfreesboro, Arkansas, USA.

## References

- Bish, D.L.; Von Dreele, R.B. Rietveld refinement of non-hydrogen atomic positions in kaolinite. *Clays Clay Miner* **1989**, *37*, 289-296.
- Downs, R.T.; Palmer, D.C. The pressure behavior of  $\alpha$  cristobalite. *American Mineralogist* **1994**, *79*, 9-14.
